# Supplementary material
Source: PubMed Central journal article supplement (PMC2906881)
Supplement: 1003738107_pnas.201003738SI.pdf [file 1003738107_pnas.201003738SI.pdf]

# Supporting Information

Jones et al. 10.1073/pnas.1003738107

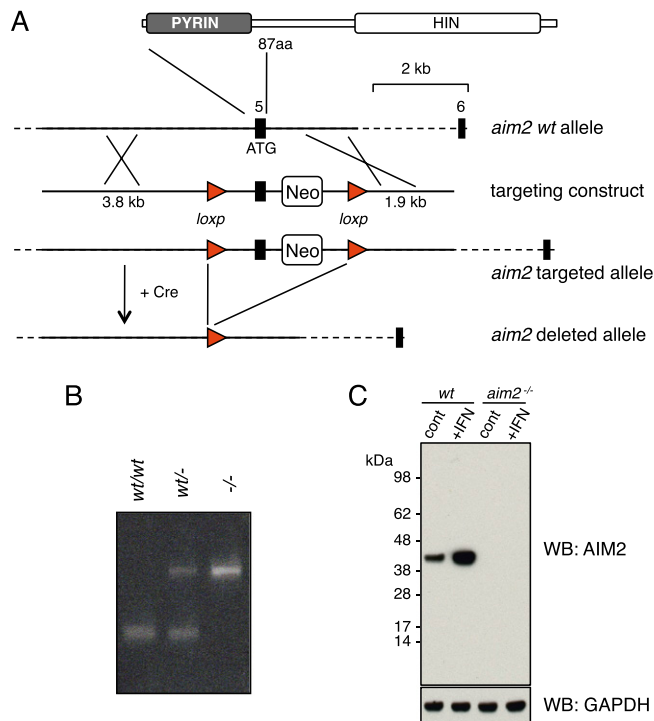

**Fig. S1.** Generation of absent in melanoma 2 (*Aim2*)<sup>-/-</sup> mice. (A) Strategy for deleting exon 5 of mouse *aim2*, which encodes the initiating methionine (ATG) and the entire PYRIN domain. Gene targeting was performed in C57BL/6 C2 embryonic stem cells. (B) PCR genotyping of *aim2*<sup>-/-</sup> mice. Primers 5' CCA GTG TTT CTC AAC TGT ACT GCT AT, 5' TAG GAG TGC CCT CCC TTA ATG, and 5' TTG GAG ACA GAC TCT GGT GAA G yield a 197-bp DNA fragment for the wild-type allele and a 397-bp DNA fragment for the knockout allele. (C) Bone marrow-derived macrophages (BMDMs) were incubated with 1,000 U/mL IFN- $\beta$  for 5 h. AIM2 was Western blotted with 4G9.1.4 rat anti-mouse AIM2 monoclonal antibody.

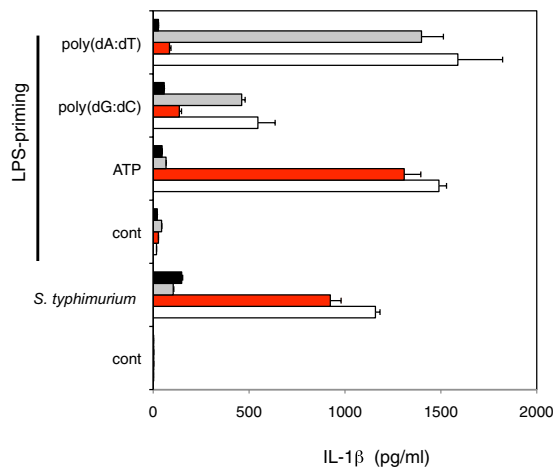

**Fig. S2.** AIM2 is essential for inflammasome activation in response to dsDNA in peritoneal macrophages. ■, *asc*<sup>-/-</sup>; ■, *nlrp3*<sup>-/-</sup> *nlrp4*<sup>-/-</sup>; ■, *aim2*<sup>-/-</sup>; □, wt. Peritoneal macrophages were harvested 5 days after i.p. injection of 4% thioglycollate (DIFCO). These macrophages were primed with 500 ng/mL LPS for 5 h, and then, they were transfected with 1  $\mu$ g/mL of the dsDNAs indicated for 16 h. As controls, LPS-primed cells were cultured in medium alone (cont) or stimulated with 5 mM ATP. Additional macrophages were not primed (cont) or were infected with *Salmonella typhimurium* (moi = 100). IL-1 $\beta$  secreted into the culture supernatant was measured by ELISA. Graphs show the mean  $\pm$  SD of triplicate wells and are representative of three independent experiments.

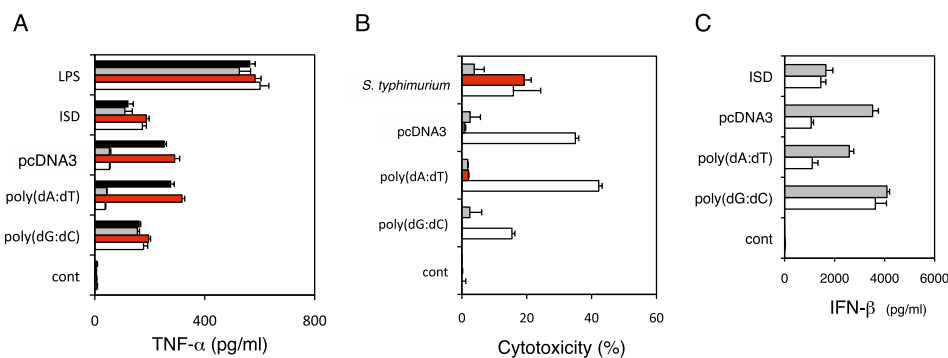

**Fig. S3.** AIM2 is dispensable for IFN- $\beta$  and TNF- $\alpha$  production in response to dsDNA. BMDMs were unstimulated (cont), treated with 1  $\mu$ g/mL LPS, or transfected with 1  $\mu$ g/mL of the dsDNAs indicated for 16 h. (A) ■, *asc*<sup>-/-</sup>; ■, *nlrp3*<sup>-/-</sup> *nlrp4*<sup>-/-</sup>; ■, *aim2*<sup>-/-</sup>; □, wt. TNF- $\alpha$  secreted into the culture supernatant was measured by Bio-Plex Cytokine Assay (Bio-Rad). (B) ■, *casp-1*<sup>-/-</sup>; ■, *aim2*<sup>-/-</sup>; □, wt. Cytotoxicity was measured by lactate dehydrogenase (LDH) release. (C) ■, *casp-1*<sup>-/-</sup>; □, wt. IFN- $\beta$  secreted into the culture supernatant was measured by ELISA. Graphs show the mean  $\pm$  SD of triplicate wells and are representative of three independent experiments.

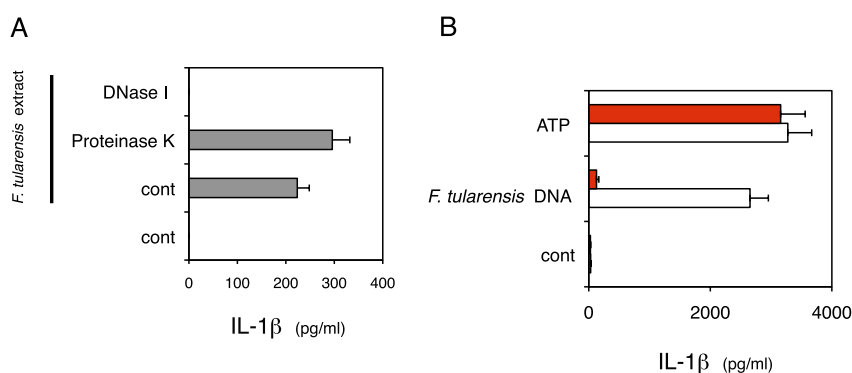

**Fig. S4.** *Francisella tularensis* DNA triggers IL-1 $\beta$  secretion. (A) Extract from *F. tularensis* ssp. *novicida* strain U112 was prepared in 10 mM Tris-HCl (pH 7.5) with a French press. Extract corresponding to  $2 \times 10^6$  cfu was treated with nothing (cont), proteinase K (Qiagen) for 16 h at 55  $^{\circ}$ C, or DNase I (Qiagen) for 2 h at 25  $^{\circ}$ C, and then, it was transfected into BMDMs primed with 500 ng/mL Pam3CSK4 for 5 h. IL-1 $\beta$  secreted into the culture supernatant was assayed 3 h later. (B) ■, *aim2*<sup>-/-</sup>; □, wt. Pam3CSK4-primed BMDMs were transfected with 1  $\mu$ g/mL *F. tularensis* DNA, which was isolated from bacteria with a Qiagen DNeasy Blood and Tissue Kit. IL-1 $\beta$  secreted into the culture supernatant was assayed 16 h later. Graphs show the mean  $\pm$  SD of triplicate wells and are representative of three independent experiments.

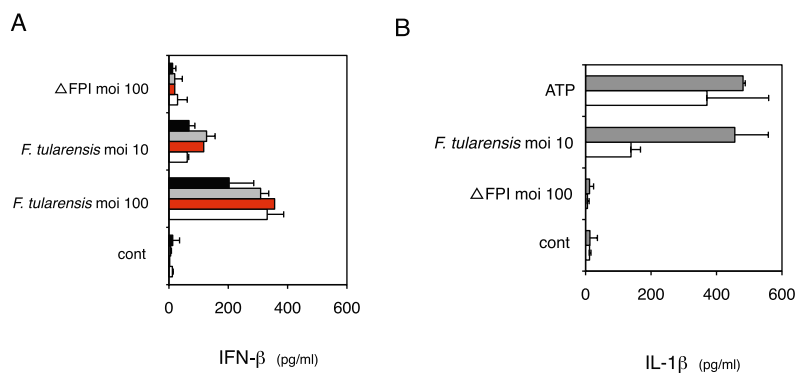

**Fig. S5.** IFN-1 facilitates formation of the AIM2-containing inflammasome. (A) ■, *asc*<sup>-/-</sup>; ■, *caspase-1*<sup>-/-</sup>; ■, *aim2*<sup>-/-</sup>; □, wt. IFN- $\beta$  secretions by BMDMs were untreated (cont) or infected with *F. tularensis* ssp. *novicida* strain U112 and isogenic mutant  $\Delta$ FPI for 5 h. (B) ■, *ifnar*<sup>-/-</sup> + AIM2/GFP; □, *ifnar*<sup>-/-</sup> + GFP. *ifnar*<sup>-/-</sup> bone marrow was transduced with pMSCV2.2-IRES-GFP-encoding mouse AIM2 or the empty parental vector after retroviral particles were generated with the Phoenix.Eco packaging cell line. Three days later, macrophages were differentiated with macrophage-colony stimulating factor (M-CSF)-containing medium, and GFP-positive cells were sorted in a FACS Aria (Becton Dickinson). These BMDMs were primed with 500 ng/mL Pam3CSK4 for 16 h and then infected with *F. tularensis* or treated with 5 mM ATP. IL-1 $\beta$  secreted into the supernatant was assayed after 5 h. Graphs show the mean  $\pm$  SD of triplicate wells and are representative of three independent experiments.
